# Supplementary material for: Incensfuran: isolation, X-ray crystal structure and absolute configuration by means of chiroptical studies in solution and solid state
Source: Royal Society of Chemistry journal article supplement (doi:10.1039/c7ra07351h), 2017-01-01
Supplement: c7ra07351h1.pdf [file c7ra07351h1.pdf]

# **Incensfuran: Isolation, X-Ray Crystal Structure and Absolute Configuration by Means of Chiroptical Studies in Solution and Solid State**

Najeeb Ur Rehman<sup>a</sup>, Hidayat Hussain<sup>a\*</sup>, Sulaiman Al-Shidhani<sup>a</sup>, Satya Kumar Avula<sup>a</sup>, Ghulam Abbas<sup>a,b</sup>, Muhammad Usman Anwar<sup>a</sup>, Marcin Górecki<sup>c,d</sup>, Gennaro Pescitelli<sup>c\*</sup>, Ahmed Al-Harrasi<sup>a\*</sup>,

<sup>a</sup> *UoN Chair of Oman's Medicinal Plants and Marine Natural Products, University of Nizwa, PO Box 33, 616 Birkat Al Mauz, Nizwa, Oman*

<sup>b</sup> *Department of Biological Sciences and Chemistry, University of Nizwa, PO Box 33, 616 Birkat Al Mauz, Nizwa, Oman*

<sup>c</sup> *Dipartimento di Chimica e Chimica Industriale, Università di Pisa, via Moruzzi 13, 56124 Pisa, Italy*

<sup>d</sup> *Institute of Organic Chemistry, Polish Academy of Sciences, ul. Kasprzaka 44/52, 01-224 Warsaw, Poland*

\* Corresponding authors. Tel.: +968-25446328; Fax: +968-25446289; E-mail addresses: [hussainchem3@gmail.com](mailto:hussainchem3@gmail.com) (H. Hussain); [gennaro.pescitelli@unipi.it](mailto:gennaro.pescitelli@unipi.it) (G. Pescitelli); [aharrasi@unizwa.edu.om](mailto:aharrasi@unizwa.edu.om) (A. Al-Harrasi).

**Table S1.** Conformers of (1*S*,4*R*,5*R*)-incensfuran (**1**) calculated *in vacuo* at B3LYP/6-311G+(d,p) level with their relative energy ( $\Delta E$ ) and populations (at 298 K).

| Conformer | $\Delta E$ / kcal mol <sup>-1</sup> | Population / % |
|-----------|-------------------------------------|----------------|
| #1        | 0.00                                | 74.31          |
| #2        | 1.00                                | 13.78          |
| #3        | 1.54                                | 5.48           |
| #4        | 1.91                                | 2.97           |
| #5        | 2.10                                | 2.14           |
| #6        | 2.39                                | 1.32           |

**Table S2.** Conformers of (1*S*,4*R*,5*R*)-incensfuran (**1**) calculated at B3LYP/6-311G+(d,p) using PCM solvent model for CHCl<sub>3</sub> with their relative energy ( $\Delta E$ ) and populations (at 298 K).

| Conformer | $\Delta E$ / kcal mol <sup>-1</sup> | Population / % |
|-----------|-------------------------------------|----------------|
| #1        | 0.00                                | 79.51          |
| #2        | 1.38                                | 7.72           |
| #3        | 1.42                                | 7.23           |
| #4        | 2.06                                | 2.46           |
| #6        | 2.26                                | 1.73           |
| #5        | 2.41                                | 1.35           |

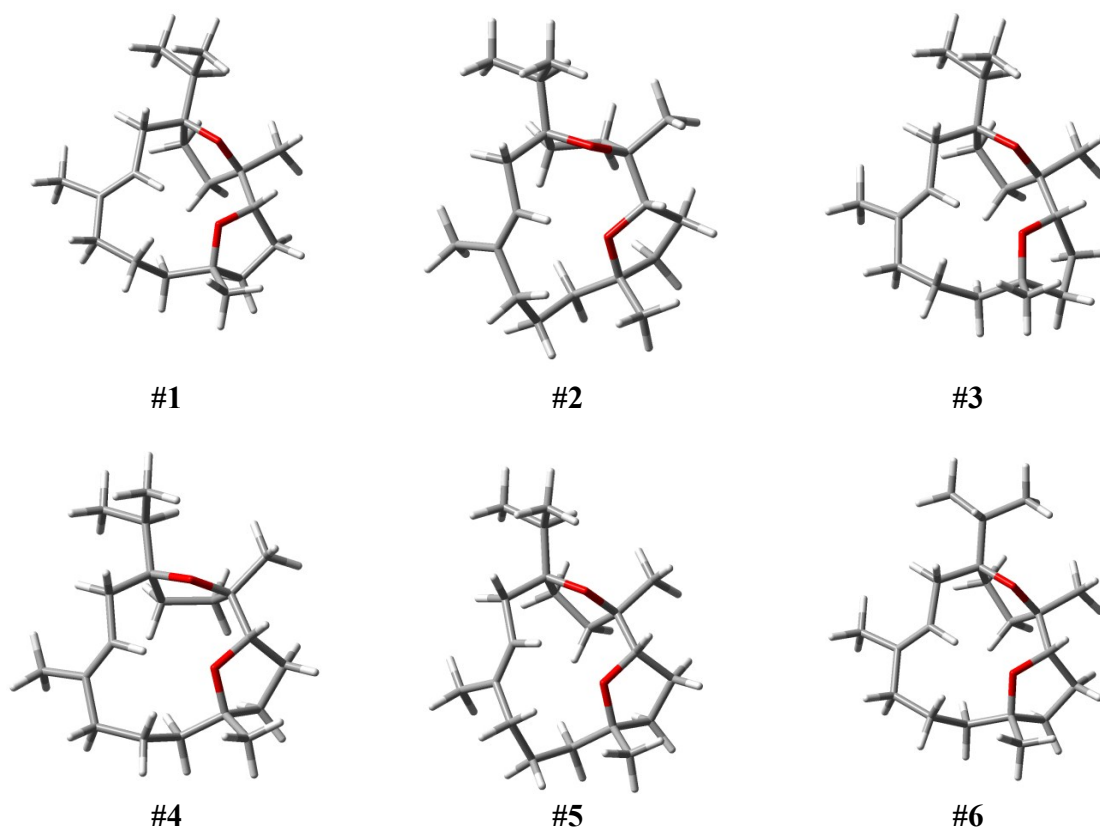

**Figure S1.** Conformers of (1*S*,4*R*,5*R*)-incensfuran (**1**) calculated *in vacuo* at B3LYP/6-311G+(d,p) level of theory.

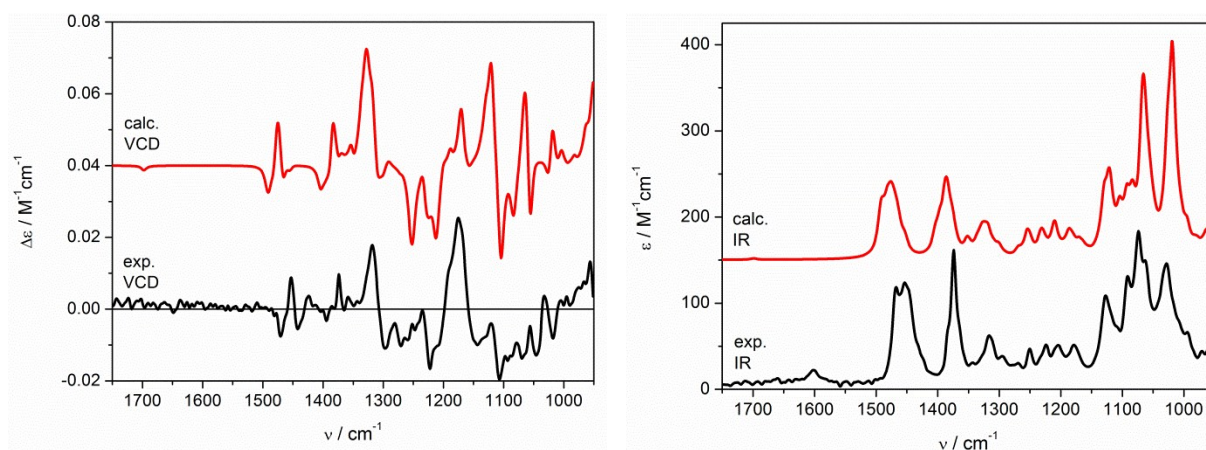

**Figure S2.** Calculated (red lines) and experimental (black lines) VCD (left) and IR (right) spectra for (1*S*,4*R*,5*R*)-incensfuran (**1**). Calculated spectra are shown with a vertical offset for clarity. Calculations run *in vacuo* at B3LYP/6-311+G(d,p) level as Boltzmann average over 6 conformers; for better comparison the calculated VCD spectrum was multiplied by 2; frequencies scaled by a factor 0.985; band-width  $\sigma = 6 \text{ cm}^{-1}$ .

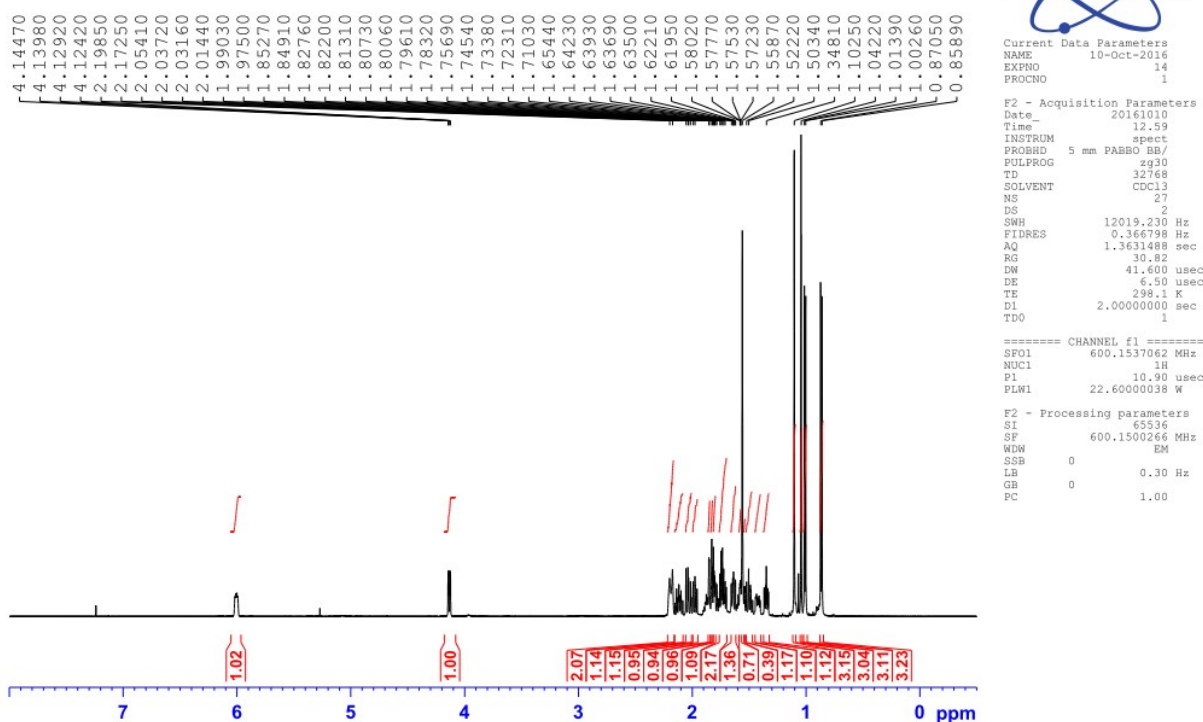

Figure S3: <sup>1</sup>H-NMR spectrum (CDCl<sub>3</sub>) of incensfuran (1).

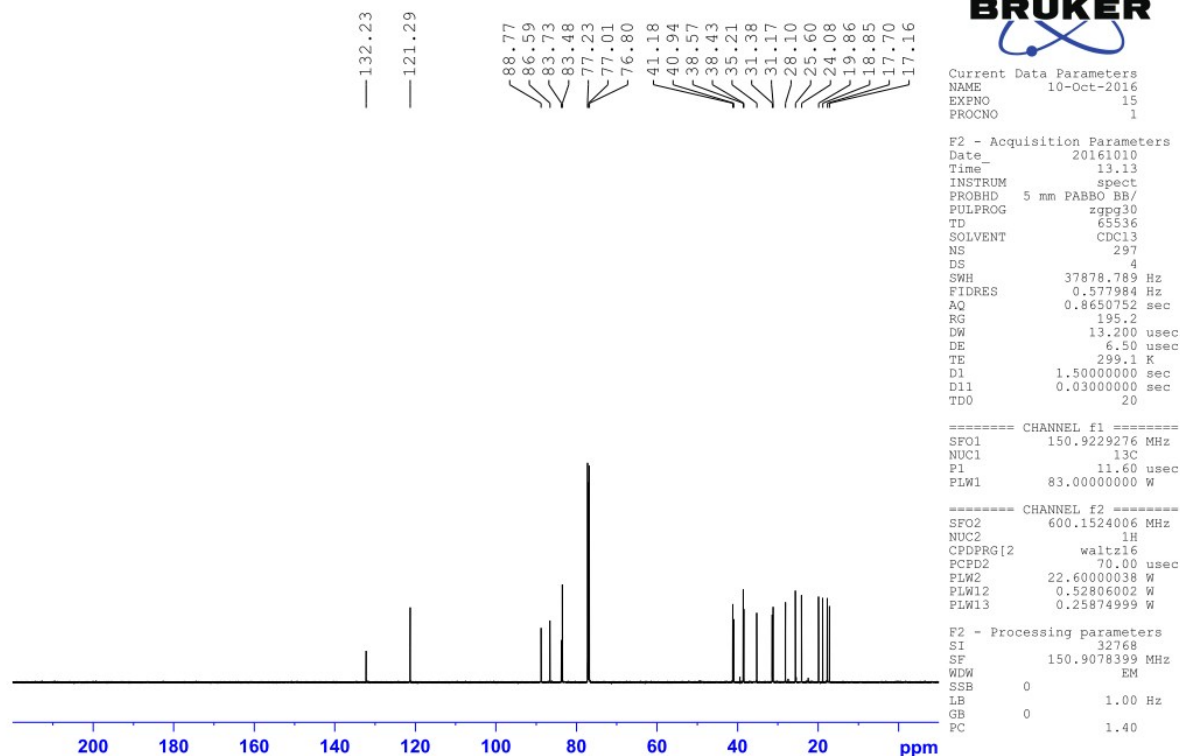

Figure S4: <sup>13</sup>C-NMR spectrum (CDCl<sub>3</sub>) of incensfuran (1).

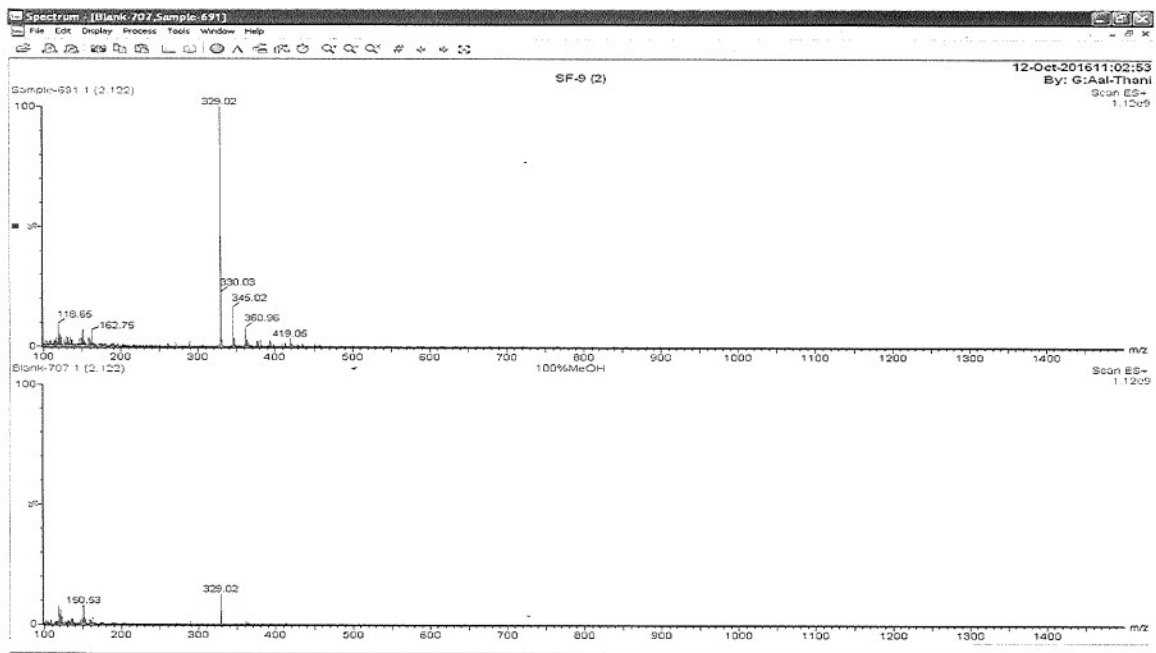

**Figure S5:** ESI-MS spectrum of incensfuran (**1**).

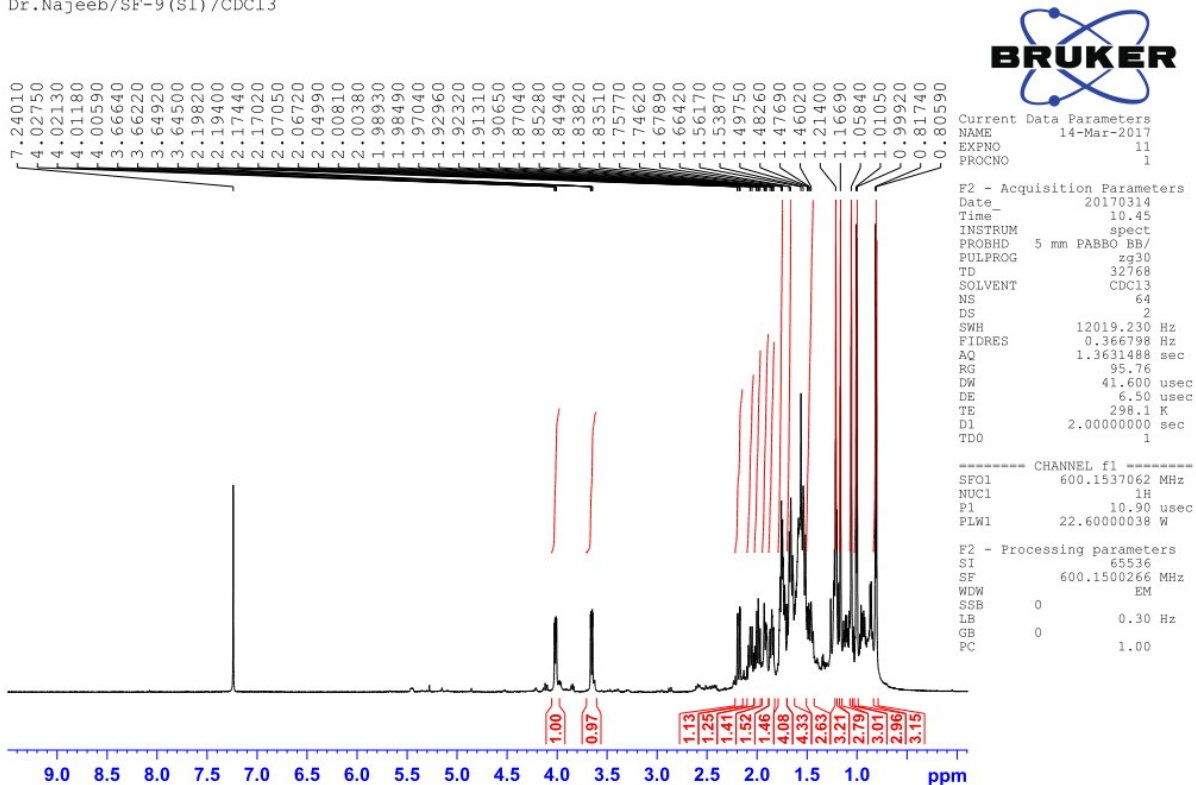Figure S6: <sup>1</sup>H-NMR spectrum (CDCl<sub>3</sub>) of compound 3.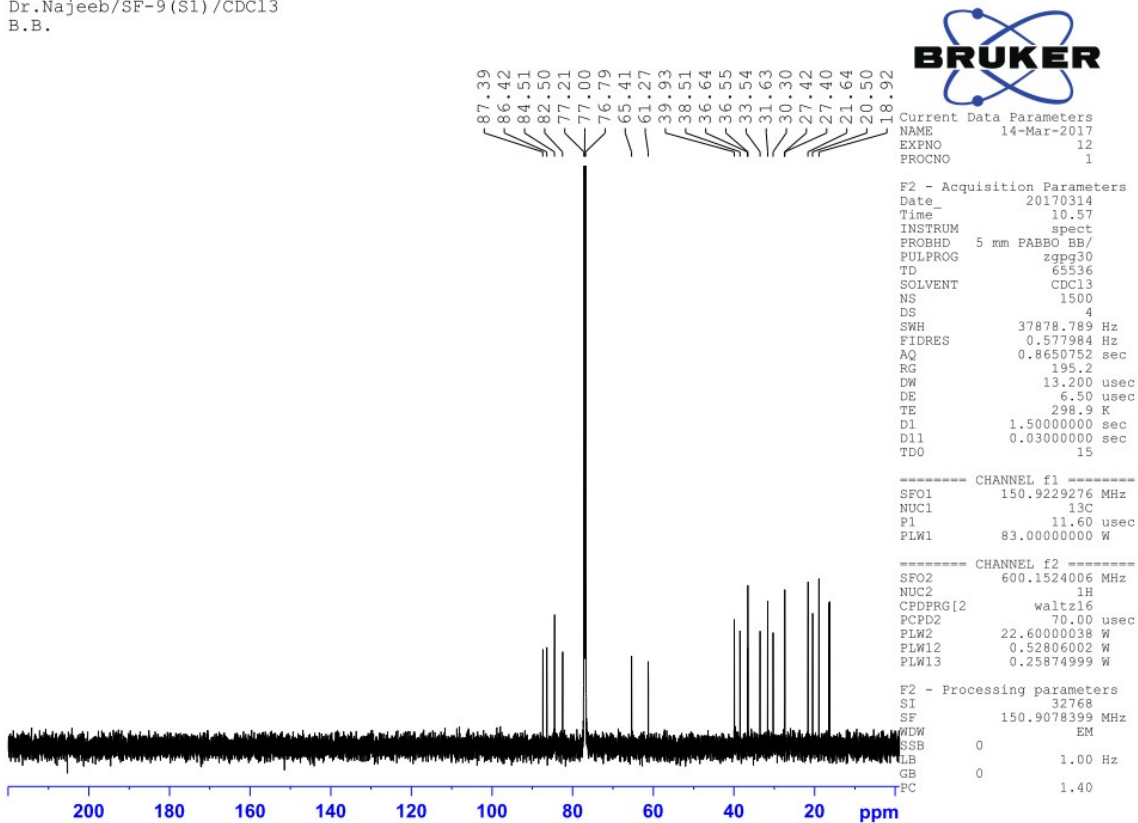Figure S7: <sup>13</sup>C-NMR spectrum (CDCl<sub>3</sub>) of compound 3.

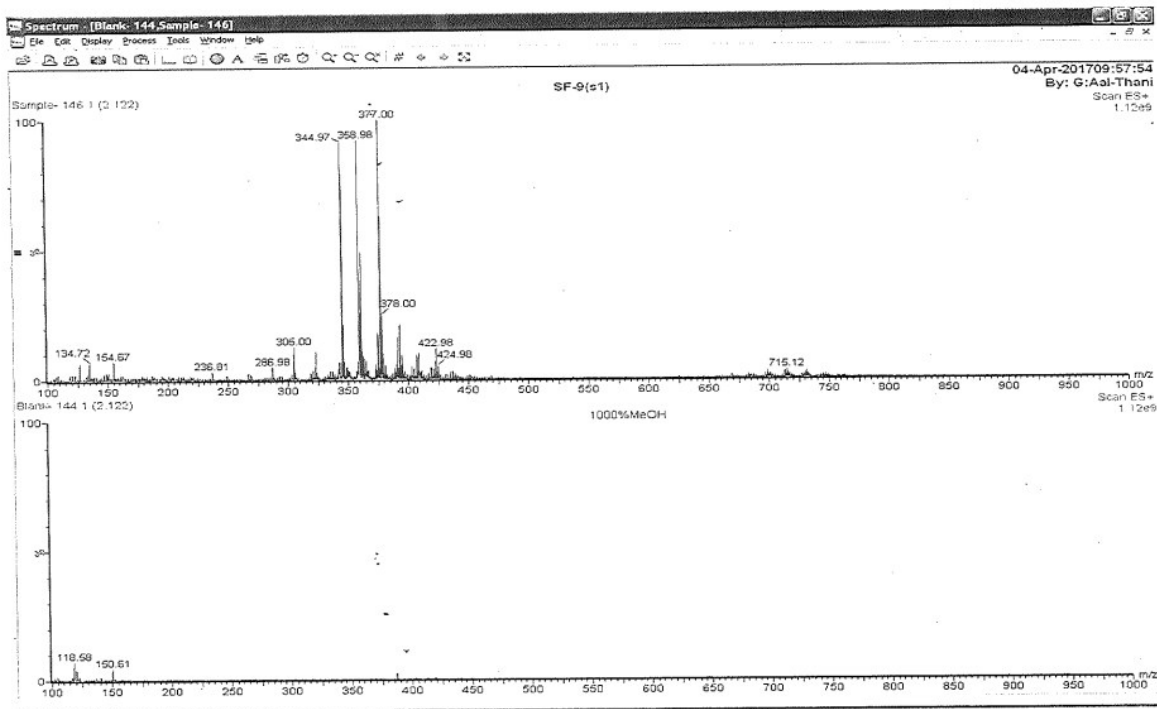

**Figure S8:** ESI-MS spectrum of compound **3**.
